# Supplementary material
Source: publisher site journal article supplement (https://www.spandidos-publications.com/4652/downloadSupplementary)
Supplement: Supplementary file 1 [file downloadSupplementary]

## Sheet: Sheet1
Table SV. All predicted miRNAs and mRNAs for dysregulated circRNAs.
A, Predicted miRNAs and mRNAs for upregulated circRNAs
miRNAs	mRNAs
mmu-miR-149-3p	Ash1l
mmu-miR-207	1700094D03Rik
mmu-miR-208a-5p	Snx27
mmu-miR-466a-3p	Vps72
mmu-miR-669c-5p	Gabpb2
mmu-miR-466b-3p	Polr3gl
mmu-miR-466c-3p	Gja5
mmu-miR-466e-3p	Fmo5
mmu-miR-466i-5p	Wars2
mmu-miR-1187	Tbx15
mmu-miR-669f-5p	Nhlh2
mmu-miR-466k	Sike1
mmu-miR-1191	Nras
mmu-miR-1195	Bcl2l15
mmu-miR-1947-3p	Lrig2
mmu-miR-3082-3p	Inka2
mmu-miR-466p-3p	Slc6a17
mmu-miR-3089-5p	Vav3
mmu-miR-3104-3p	Csrnp2
mmu-miR-1186b	Slc4a8
mmu-miR-345-3p	Hoxc8
mmu-miR-20b-3p	Cbx5
mmu-miR-1298-5p	Eef2kmt
mmu-miR-674-5p	Emp2
mmu-miR-883a-3p	Rmi2
mmu-miR-466f-3p	Snai2
mmu-miR-467c-3p	Ube2v2
mmu-miR-466d-3p	Hic2
mmu-miR-467e-3p	Ufd1
mmu-miR-669f-3p	Mrpl40
mmu-miR-669h-3p	Ehhadh
mmu-miR-467g	Dgkg
mmu-miR-669l-3p	Apod
mmu-miR-1960	Senp5
mmu-miR-466m-3p	Fbxo45
mmu-miR-669d-2-3p	Smco1
mmu-miR-466o-3p	Mylk
mmu-miR-466n-5p	Skint7
mmu-miR-3473b	Trabd2b
mmu-miR-127-5p	Efcab14
mmu-miR-188-3p	Mob3c
mmu-miR-330-5p	Faah
mmu-miR-466a-5p	Mmachc
mmu-miR-466e-5p	Zfp691
mmu-miR-1894-5p	Ppih
mmu-miR-3065-3p	Foxj3
mmu-miR-466p-5p	Hivep3
mmu-miR-3110-5p	Grik3
mmu-miR-5626-5p	Csf3r
mmu-miR-1249-5p	Ago1
mmu-miR-690	Hpca
mmu-miR-669c-3p	Zbtb8b
mmu-miR-1892	Gmeb1
mmu-miR-1981-5p	Med18
mmu-miR-3082-5p	Xkr8
mmu-miR-3473	Pigv
mmu-miR-3473d	Man1c1
mmu-miR-5623-3p	Tmem50a
mmu-miR-1186	Zfp46
mmu-miR-3470a	Ldlrad2
mmu-miR-3470b	Ece1
mmu-miR-320-5p	Cdc14a
mmu-miR-760-5p	Slc35a3
mmu-miR-5110	Agl
mmu-miR-125a-3p	Abcd3
mmu-miR-468-5p	Ank2
mmu-miR-470-3p	Ap1ar
mmu-miR-423-5p	Elovl6
mmu-miR-1196-5p	Sgms2
mmu-miR-1197-3p	Tet2
mmu-miR-3076-5p	Trmt10a
mmu-miR-3103-3p	Unc5c
mmu-miR-3472	Clca3a2
mmu-miR-3474	Ttll7
mmu-miR-674-3p	Ifi44
mmu-miR-1943-5p	Dnajb4
mmu-miR-1903	Tyw3
mmu-miR-1966	Tgs1
mmu-miR-3096-3p	Plag1
mmu-miR-324-5p	Clvs1
mmu-miR-706	Ints8
mmu-miR-709	Mms22l
mmu-miR-574-5p	Epha7
mmu-miR-466f	Bach2
mmu-miR-1935	Cnr1
mmu-miR-1946a	Aco1
mmu-miR-1968-5p	Aptx
mmu-miR-16-5p	Aqp7
mmu-miR-181c-5p	Med16
mmu-miR-217-5p	Nmrk2
mmu-miR-467a-3p	Bpifc
mmu-miR-677-3p	Syn3
mmu-miR-669b-3p	Slc5a8
mmu-miR-297b-3p	Slc17a8
mmu-miR-297a-3p	Uhrf1bp1l
mmu-miR-297c-3p	Vezt
mmu-miR-466i-3p	Lin7a
mmu-miR-467f	Thap2
mmu-miR-3064-5p	Lgr5
mmu-miR-466q	Ptprb
mmu-miR-5107	Mdm2
mmu-miR-1231-5p	Gns
mmu-miR-3113-3p	Tspan31
mmu-miR-448-5p	Nab2
mmu-miR-667-5p	Nemp1
mmu-miR-3099-5p	Zbtb39
mmu-miR-30c-1-3p	Baz2a
mmu-miR-21-3p	Rbms2
mmu-miR-329-5p	Ankrd52
mmu-miR-1906	Rnf41
mmu-miR-1962	Adarb2
mmu-miR-3473c	Edaradd
mmu-miR-5134	Hecw1
mmu-miR-222-5p	Cdk13
mmu-miR-452-3p	Btn2a2
mmu-miR-3059-3p	Foxf2
mmu-miR-467d-3p	Ssr1
mmu-miR-201-5p	Tmem170b
mmu-let-7b-5p	Gfod1
mmu-miR-1224-3p	Atxn1
mmu-miR-705	Cap2
mmu-miR-1955-5p	Zfp169
mmu-miR-344f-3p	Bicd2
mmu-miR-5622-5p	Iars
mmu-miR-1965	Cplx2
mmu-miR-1946b	Slc28a3
mmu-miR-5102	Cts8
mmu-miR-194-5p	Nrf1
mmu-miR-365-1-5p	Mtpn
mmu-miR-1940	D630045J12Rik
mmu-miR-192-3p	Zc3hav1l
mmu-miR-298-5p	Ttc26
mmu-miR-324-3p	Ubn2
mmu-miR-540-3p	Tmem178b
mmu-miR-695	Hoxa10
mmu-miR-3085-5p	Adcyap1r1
mmu-miR-3110-3p	Ppm1k
mmu-miR-5098	Cd8b1
mmu-miR-669n	Rmnd5a
	St3gal5
	Ggcx
	Tacr1
	Sema4f
	Loxl3
	Dqx1
	Stambp
	Nat8f2
	Tprkb
	Sec14l3
	Znrf3
	Tns3
	B3gnt2
	Lcp2
	Adra1b
	Lsm11
	Btnl9
	Zfp354a
	Fnip1
	Fkbp6
	Ywhag
	Serpine1
	Zfp113
	Zfp68
	Zfand2a
	Uncx
	Elfn1
	Foxk1
	Ap5z1
	Rbak
	Rnf6
	Cep76
	Tcf4
	Dcc
	Smad2
	Pstpip2
	Mbp
	Zfp516
	Kmt5b
	Bbs1
	Gal3st3
	Tigd3
	Slc22a8
	Slc3a2
	Ttc9c
	Ms4a4c
	Stx3
	Kcna4
	Ptpro
	Abcc9
	St8sia1
	Prpf31
	Pira2
	Rdh13
	Shisa7
	Zfp444
	Usp29
	Zscan4c
	Zscan4d
	Zfp329
	Zfp446
	Bloc1s3
	Synrg
	Rad51c
	Msi2
	Trim25
	Stxbp4
	Car10
	Rsad1
	Pcgf2
	Cwc25
	Rpl23
	Cdk12
	Msl1
	Rapgefl1
	Rara
	Tns4
	Krt222
	Dusp3
	Ubtf
	Itgb3
	Mettl2
	Apol8
	Rac2
	Micall1
	Fam227a
	Tnrc6b
	Tnfrsf13c
	Pacsin2
	Pnpla3
	Shisal1
	Gxylt1
	Zfp641
	Atf1
	Appl1
	Tasor
	Prkcd
	Rft1
	Glt8d1
	Ercc6
	Zfp488
	Syt15
	Ldb3
	Prxl2a
	Hnrnpc
	Tox4
	Ajuba
	Psmb11
	Nfatc4
	Cbln3
	Zmym5
	Amer2
	Ints6
	Mnat1
	Akap5
	Plekhg3
	Synj2bp
	Acot2
	Dnal1
	Alkbh1
	Ston2
	Gpr68
	Gon7
	Serpina1a
	Dicer1
	Clmn
	Zfp839
	Trmt61a
	Klc1
	Xrcc3
	Cep170b
	Tmem196
	Slc10a5
	Tbl1xr1
	Nceh1
	Samd7
	Zmat3
	Pik3ca
	Gnb4
	Acad9
	Pcdh10
	Slc7a11
	Ccdc169
	Ankub1
	Fnip2
	Gask1b
	Cd1d1
	Etv3
	Sh2d2a
	Bub1
	Gna13
	Kcnj16
	Trim65
	Rnf157
	St6galnac1
	Nploc4
	Asxl2
	Efr3b
	Ubxn2a
	Vsnl1
	Greb1
	Nol10
	Nrcam
	Stxbp6
	Nkx2-1
	Nkx2-9
	Slc25a21
	Ctsl
	Zfp874b
	Mtrr
	Cep72
	Ccdc127
	Lrrc14b
	Atg10
	Mtx3
	Iqgap2
	Gcnt4
	Gtf2h2
	Ocln
	Pik3r1
	Mast4
	Srek1
	Rab3c
	Mcidas
	Arl15
	Dnase1l3
	Fam107a
	Atxn7
	Oxsm
	Nkiras1
	Xk
	Klhl13
	Nkap
	Gria3
	Rap2c
	Mbnl3
	Zfp449
	Ids
	Prrg3
	Atp2b3
	Slc6a8
	L1cam
	Dkc1
	Tmem47
	Dmd
	Arhgef9
	Tbc1d24
	Ccdc78
	Fbxl16
	Tbc1d22b
	Mdga1
	Rrp1b
	Zfp871
	Zfp799
	Rab11b
	Wdr46
	Neu1
	Arl5a
	Galnt13
	Nr4a2
	Ermn
	Cytip
	Ccdc148
	Scn2a
	Csrnp3
	Dcaf17
	Slc25a12
	Map3k20
	Chrna1
	Lnpk
	Pde1a
	Aplnr
	Acp2
	Tspan18
	Tmod2
	Gcm1
	Slc17a5
	Col12a1
	Tent5a
	Syncrip
	Chst2
	Armc8
	Rad54l2
	Cacna2d2
	Hyal1
	Bsn
	Dag1
	Plxnb1
	Map4
	Dync1li1
	Gpd1l
	Azi2
	Gask1a
	Kif15
	Zdhhc3
	Limd1
	Ppp2r3d
	Plcb1
	Snap25
	Vwa5a
	Mcam
	Scn2b
	Bace1
	Htr3b
	Ncam1
	Plet1
	Atm
	AY074887
	Sin3a
	1700017B05Rik
	Itga11
	Pias1
	Hacd3
	Igdcc3
	Rasl12
	Pclaf
	Tln2
	Ccpg1
	Dzank1
	Polr3f
	Rbbp9
	Celf2
	Taf3
	Il15ra
	Tmem236
	Arl5b
	Gad2
	Camsap1
	Ubac1
	Nacc2
	Tbc1d13
	Lhx6
	Rabgap1
	Strbp
	Nr6a1
	Zeb2
	Snx12
	Chic1
	P2ry10b
	Tbx22
	Hdx
	Diaph2
	Sytl4
	Gla
	Rab9b
	Rbm41
	Gnl3l
	Klf8
	Cnksr2
	Reps2
	Car5b
	Egfl6
	Pak6
	Rtf1
	Mga
	Mapkbp1
	Zscan29
	Mfap1a
	Bloc1s6
	Sppl2a
	Bcl2l11
	Polr1b
	Atrn
	Spef1
	Rassf2
	Cds2
	Gpcpd1
	Btbd3
	N4bp2l2
	Pds5b
	Kl
	Sdhaf3
	Rnasel
	Cacna1e
	Xpr1
	Soat1
	Rasal2
	Dars2
	Prrx1
	Ildr2
	Pogk
	Tmco1
	Lmx1a
	Pbx1
	Nectin4
	Vangl2
	Kcnj10
	Igsf9
	Cadm3
	Ifi203
	Pld5
	Wdr26
	Enah
	Bpnt1
	Slc30a10
	Rcor3
	A130010J15Rik
	Camk1d
	Kcnc1
	Saa4
	E2f8
	Nav2
	Asb7
	Mef2a
	Igf1r
	Fam169b
	Mctp2
	Ntrk3
	Gdpgp1
	Vps33b
	Man2a2
	Homer2
	Kctd21
	Kctd14
	Rsf1
	Pgm2l1
	P4ha3
	Tll1
	Psd3
	Zfp963
	Ncan
	Slc25a42
	Pde4c
	Ankle1
	Zfp882
	Slc35e1
	Smim7
	Nwd1
	Mcm5
	Rasd2
	Zfp827
	Rnf150
	Dnajb1
	Gipc1
	Slc6a2
	Ces1g
	Nup93
	Fhod1
	Tango6
	Ceacam1
	Zfp607b
	Kcnk6
	Zfp74
	Rgs9bp
	Iglon5
	Cd33
	Spib
	Dhdh
	Trim12c
	Olfr658
	Ric3
	Eif4g2
	Usp47
	Itpripl2
	Tmc7
	Knop1
	Mosmo
	Gga2
	Slx1b
	Cd2bp2
	Zfp553
	Fbrs
	Stx1b
	Chst15
	Ebf3
	Adgra1
	Zfp941
	Ostf1
	Rorb
	Zfand5
	Gda
	Cemip2
	Apba1
	Pgm5
	Smarca2
	Rfx3
	Cd274
	9930021J03Rik
	Asah2
	Pten
	Ifit1
	Btaf1
	Arhgap19
	Zfyve27
	Golga7b
	Cox15
	Scd3
	Hif1an
	Slf2
	Btrc
	Wbp1l
	Trub1
	Emx2
	Csf2ra
	Usp27x
	Was
	Haus2
	Cdan1
	Tubb5
	Cd2ap
	Clic5
	Tmem151b
	Vegfa
	Mocs1
	Plin3
	Acer1
	Fbxl17
	Rasgrp3
	Slc8a1
	Cd93
	Pofut1
	Cbfa2t2
	E2f1
	Soga1
	D630003M21Rik
	Fitm2
	Wfdc12
	Trp53rkb
	Kcnb1
	Pck1
	Vapb
	Ss18l1
	Gata5
	Sema5b
	Stxbp5l
	Gsk3b
	Igsf11
	Gramd1c
	Cd200r1
	Nxpe3
	Cep97
	Nsun3
	Cadm2
	Rbm11
	N6amt1
	Bach1
	Paxbp1
	Ifnar1
	Slc5a3
	Runx1
	Fndc1
	Prdm9
	Lix1
	2810021J22Rik
	Zfp39
	Kcnj12
	Akap10
	Hs3st3b1
	Tmem220
	Myh10
	Pfas
	Slc2a4
	4930563E22Rik
	Ankfy1
	Cyb5d2
	Slc43a2
	Rflnb
	Slc6a4
	Abhd15
	Nufip2
	Zfp830
	Rad51d
	Slfn5
	Dph6
	Npbwr1
	St18
	Sgk3
	Prex2
	Tfap2b
	Lmbrd1
	Fam168b
	Cnnm3
	Creg2
	Il1rl1
	Il18r1
	Stat1
	Nab1
	Plcl1
	Casp8
	Cd28
	Fzd5
	D630023F18Rik
	Tns1
	Pla2g2d
	Nbl1
	Iffo2
	Hspb7
	Fblim1
	Prdm2
	Agtrap
	Draxin
	Angptl7
	Casz1
	Kif1b
	Tmem201
	Gpr157
	Tnfrsf9
	Vamp3
	Dffb
	Prdm16
	Ski
	Slc35e2
	Tas1r3
	Ube2j2
	Rbm48
	Steap2
	Dmtf1
	Pclo
	Rsbn1l
	Frmd5
	Casc4
	Nfat5
	Zfhx3
	Ddx19b
	Adat1
	Banp
	Afg3l1
	Rhou
	Nup133
	Rbm34
	Trpc6
	Ccdc82
	Amotl1
	Fat3
	Zfp558
	Zfp26
	Pin1
	Ilf3
	Anln
	Opcml
	Ntm
	Zbtb44
	Kcnj5
	Pate9
	Chek1
	Unc13b
	Polr1e
	Dcaf10
	Slc25a51
	Stx17
	Fsd1l
	Zfp462
	Tmem245
	Palm2
	Akap2
	Inip
	Snx30
	Slc31a2
	Pappa
	Bnc2
	Slc24a2
	Mllt3
	Acot11
	Podn
	Zyg11b
	Epha4
	Ap1s3
	A630001G21Rik
	Ncl
	Cops7b
	Chrnd
	Agap1
	Kif1a
	Neu4
	Rnf152
	Tnfrsf11a
	Bcl2
	Serpinb8
	Tfcp2l1
	Cd55
	Pigr
	Elk4
	Golt1a
	Nav1
	Glrx2
	Rgl1
	Preb
	Supt7l
	Fosl2
	Nat8l
	Htt
	Wfs1
	Zfp518b
	Commd8
	Srp72
	Slc4a4
	Cxcl5
	Cxcl15
	Aak1
	Plxna1
	Wnt7a
	Slc6a6
	Eogt
	Ppp4r2
	Cntn3
	Oxtr
	Srgap3
	Lhfpl4
	Mkrn2os
	Cand2
	Mbd4
	Zfp422
	Zfp248
	Lrtm2
	Erc1
	Gdf3
	Eno2
	Cd4
	Clec7a
	Klra2
	Epas1
	Ttc7
	Nrxn1
	Arhgap12
	Riok3
	B4galt6
	Slc25a46
	Iws1
	Camk4
	Fam53c
	Slc23a1
	Dnajc18
	Psd2
	Pura
	Pcdhb13
	Trim36
	Sema6a
	Slc12a2
	Gm4951
	Gm4841
	Onecut2
	Fech
	Atp8b1
	Nedd4l
	Gnal
	Fzd3
	Slc39a14
	Nudt18
	Fam160b2
	Xpo7
	Gfra2
	Fndc3a
	Pcdh17
	Ranbp3l
	Npr3
	Cdh12
	Sema5a
	Erich5
	Fbxo43
	Ywhaz
	Trhr
	Has2
	Atad2
	Cracr2b
	Igf2
	Fadd
	Insr
	Kbtbd11
	Mcph1
	Tpte
	Tacc1
	Ddhd2
	Pomk
	Hook3
	Thap1
	Rab11fip1
	Unc5d
	Wrn
	Lonrf1
	AI429214
	Msr1
	Vps37a
	Slc7a2
	Rwdd4a
	Mavs
	Phactr2
	Gje1
	Akap7
	Ptprk
	9330159F19Rik
	Frk
	Slc16a10
	Cdk19
	Ddo
	Prdm1
	Lin28b
	Nus1
	Pkib
	Spock2
	Adamts14
	Rufy2
	Ado
	Rhobtb1
	Slc16a9
	Pcdh15
	Zfp280b
	Ybey
	Pdxk
	Cxcl9
	Shroom3
	Fras1
	Prdm8
	Lin54
	Zfp326
	Barhl2
	Zfp644
	Tgfbr3
	1700028K03Rik
	Tmed5
	Pcgf3
	Pitpnb
	Git2
	Mlec
	Dynll1
	Gatc
	Oas3
	Oas1e
	Sh2b3
	Atp2a2
	Psmd9
	2810006K23Rik
	Ddx55
	Dhx37
	Tmem132b
	Trim44
	Slc1a2
B, Predicted miRNAs and mRNAs for downregulated circRNAs
miRNAs	mRNAs
mmu-miR-1186b	Ash1l
mmu-let-7i-5p	1700094D03Rik
mmu-miR-297c-5p	Vps72
mmu-miR-504-3p	Gabpb2
mmu-miR-466j	Polr3gl
mmu-miR-1896	Gja5
mmu-miR-669m-5p	Fmo5
mmu-miR-466m-5p	Wars2
mmu-miR-345-3p	Tbx15
mmu-miR-467a-3p	Sike1
mmu-miR-677-5p	Nras
mmu-miR-669b-3p	Bcl2l15
mmu-miR-669c-3p	Lrig2
mmu-miR-706	Inka2
mmu-miR-709	Slc6a17
mmu-miR-466f-3p	Fndc7
mmu-miR-669d-3p	Slc4a8
mmu-miR-466i-3p	Scn8a
mmu-miR-669f-3p	Calcoco1
mmu-miR-467f	Hoxc8
mmu-miR-467g	Eef2kmt
mmu-miR-1195	Rmi2
mmu-miR-1935	Snai2
mmu-miR-1946a	Ube2v2
mmu-miR-466m-3p	Ufd1
mmu-miR-3971	Mrpl40
mmu-miR-201-5p	Ehhadh
mmu-miR-466a-5p	Dgkg
mmu-miR-466c-5p	Lpp
mmu-miR-466e-5p	Apod
mmu-miR-1186	Senp5
mmu-miR-1196-5p	Smco1
mmu-miR-1907	Mylk
mmu-miR-1947-3p	Skint7
mmu-miR-3076-3p	Efcab14
mmu-miR-466p-5p	Mob3c
mmu-miR-3473	Faah
mmu-miR-3473b	Mmachc
mmu-miR-5102	Zfp691
mmu-miR-5623-3p	Ppih
mmu-miR-672-5p	Foxj3
mmu-miR-504-5p	Hivep3
mmu-miR-1927	Grik3
mmu-miR-1943-5p	Csf3r
mmu-miR-5110	Ago1
mmu-miR-742-3p	Hpca
mmu-miR-330-5p	Zbtb8b
mmu-miR-302c-3p	Gmeb1
mmu-miR-880-3p	Med18
mmu-miR-466h-3p	Pigv
mmu-miR-466d-5p	Man1c1
mmu-miR-466i-5p	Tmem50a
mmu-miR-1187	Eloa
mmu-miR-669n	Zfp46
mmu-miR-3085-5p	Ldlrad2
mmu-miR-466n-5p	Ece1
mmu-miR-5128	Olfm3
mmu-miR-149-3p	Cdc14a
mmu-miR-1249-5p	Slc35a3
mmu-miR-105	Agl
mmu-miR-1965	Abcd3
mmu-miR-1946b	Ank2
mmu-miR-140-5p	Ap1ar
mmu-miR-146a-5p	Elovl6
mmu-miR-207	Sgms2
mmu-miR-297a-5p	Tet2
mmu-miR-93-5p	Trmt10a
mmu-miR-505-5p	Unc5c
mmu-miR-327	Ifi44
mmu-miR-466f-5p	Dnajb4
mmu-miR-574-5p	Tyw3
mmu-miR-669k-5p	Plag1
mmu-miR-3473d	Ubxn2b
mmu-miR-703	Car8
mmu-miR-15a-5p	Clvs1
mmu-miR-466k	Ints8
mmu-miR-3470a	Runx1t1
mmu-miR-3470b	Mms22l
mmu-miR-1982.1-3p	Fut9
mmu-miR-468-5p	Epha7
mmu-miR-874-3p	Map3k7
mmu-miR-669h-3p	Bach2
mmu-miR-3089-5p	Cnr1
mmu-miR-466a-3p	Aco1
mmu-miR-761	Aptx
mmu-miR-466b-3p	Aqp7
mmu-miR-466c-3p	Med16
mmu-miR-466e-3p	Nmrk2
mmu-miR-466d-3p	Bpifc
mmu-miR-466p-3p	Syn3
mmu-miR-466q	Slc5a8
mmu-miR-671-5p	Slc17a8
mmu-miR-297b-3p	Uhrf1bp1l
mmu-miR-297a-3p	Cdk17
mmu-miR-297c-3p	Vezt
mmu-miR-344-5p	Lin7a
mmu-miR-693-3p	Thap2
mmu-miR-876-5p	Lgr5
mmu-miR-3097-3p	Ptprb
mmu-miR-344b-5p	Mdm2
mmu-miR-3474	Tspan31
mmu-miR-5106	Nab2
mmu-miR-3473c	Zbtb39
	Baz2a
	Rbms2
	Rnf41
	Adarb2
	Hecw1
	Cdk13
	Btn2a2
	Foxf2
	Ssr1
	Tmem170b
	Gfod1
	Atxn1
	Cap2
	Zfp169
	Iars
	Cplx2
	Slc28a3
	Smo
	Nrf1
	Mtpn
	D630045J12Rik
	Zc3hav1l
	Ttc26
	Ubn2
	Luc7l2
	Tmem178b
	Cntnap2
	Adcyap1r1
	Ppm1k
	Herc3
	Cd8b1
	Rmnd5a
	Mrpl35
	St3gal5
	Ggcx
	Tacr1
	Loxl3
	Dqx1
	Nat8f2
	Tprkb
	Znrf3
	Tns3
	Hus1
	B3gnt2
	Lcp2
	Adra1b
	Lsm11
	Havcr2
	Btnl9
	Zfp354a
	Aff4
	Fkbp6
	Ywhag
	Serpine1
	Zfp113
	Zfp68
	Zfand2a
	Uncx
	Elfn1
	Foxk1
	Ap5z1
	Rbak
	Rnf6
	Cep76
	Tcf4
	Smad2
	Pstpip2
	Mbp
	Zfp516
	Kmt5b
	Kdm2a
	Rbm4b
	Bbs1
	Gal3st3
	Tigd3
	Slc22a8
	Slc3a2
	Ttc9c
	Lrrn4cl
	Kcna4
	Abcc9
	St8sia1
	Pira2
	Rdh13
	Shisa7
	Zfp444
	Usp29
	Zfp772
	Zscan4c
	Zscan4d
	Zfp606
	Zfp329
	Zfp446
	Bloc1s3
	Synrg
	Rad51c
	Msi2
	Trim25
	Pctp
	Stxbp4
	Car10
	Rsad1
	Ngfr
	Pcgf2
	Cwc25
	Rpl23
	Cdk12
	Neurod2
	Msl1
	Rapgefl1
	Rara
	Tns4
	Krt222
	Dusp3
	Ubtf
	Apol8
	Rac2
	Micall1
	Fam227a
	Tnrc6b
	Tnfrsf13c
	Pacsin2
	Pnpla3
	Gxylt1
	Vdr
	Zfp641
	Atf1
	Polr3a
	Dennd6a
	Appl1
	Tasor
	Prkcd
	Glt8d1
	Zfp488
	Syt15
	Glud1
	Ldb3
	Prxl2a
	Ptgdr
	Hnrnpc
	Tox4
	Ajuba
	Psmb11
	Nfatc4
	Cbln3
	Amer2
	Ints6
	Mnat1
	Akap5
	Plekhg3
	Slc8a3
	Synj2bp
	Acot2
	Alkbh1
	Ston2
	Gpr68
	Gon7
	Serpina1a
	Dicer1
	Zfp839
	Trmt61a
	Xrcc3
	Cep170b
	Tmem196
	Slc10a5
	Tbl1xr1
	Nceh1
	Samd7
	Prkci
	Zmat3
	Pik3ca
	Gnb4
	Acad9
	Ccna2
	Il21
	Pcdh10
	Slc7a11
	Ccdc169
	Dclk1
	Ankub1
	Gask1b
	Cd1d1
	Etv3
	Sh2d2a
	Bub1
	Gna13
	Kcnj16
	Trim65
	Rnf157
	St6galnac1
	Nploc4
	Asxl2
	Efr3b
	Vsnl1
	Fam49a
	Greb1
	Nol10
	Nrcam
	Stxbp6
	Nkx2-1
	Nkx2-9
	Slc25a21
	Ctsl
	Zfp874b
	Zfp729a
	Mtrr
	Cep72
	Ccdc127
	Lrrc14b
	Ell2
	Atg10
	Mtx3
	Iqgap2
	Gcnt4
	Gtf2h2
	Pik3r1
	Mast4
	Srek1
	Rab3c
	Il6st
	Arl15
	Dnase1l3
	Fam107a
	Atxn7
	Oxsm
	Nkiras1
	Xk
	Elk1
	Klhl13
	Lonrf3
	Nkap
	Gria3
	Mbnl3
	Zfp449
	Ids
	Prrg3
	Atp2b3
	Slc6a8
	L1cam
	Dkc1
	Tmem47
	Dmd
	Arhgef9
	Amer1
	Tbc1d24
	Fbxl16
	Mdga1
	Zfp871
	Zfp799
	Wdr46
	Neu1
	Arl5a
	Kcnj3
	Nr4a2
	Ermn
	Cytip
	Ccdc148
	Baz2b
	Scn2a
	Csrnp3
	Klhl23
	Dcaf17
	Slc25a12
	Map3k20
	Chrna1
	Lnpk
	Pde1a
	Aplnr
	Ptprj
	Acp2
	Trp53i11
	Tspan18
	Tmod2
	Slc17a5
	Tent5a
	Chst2
	Rasa2
	Armc8
	Rab6b
	Rad54l2
	Cacna2d2
	Bsn
	Map4
	Fbxl2
	Gpd1l
	Azi2
	Itga9
	Gorasp1
	Gask1a
	Kif15
	Zdhhc3
	Plcb1
	Snap25
	Vwa5a
	Mcam
	Ncam1
	Plet1
	Atm
	AY074887
	Sin3a
	Itga11
	Pias1
	Hacd3
	Rasl12
	Pclaf
	Tln2
	Ccpg1
	Myo5c
	Dzank1
	Rbbp9
	Celf2
	Il15ra
	Tmem236
	Arl5b
	Gad2
	Camsap1
	Ubac1
	Nacc2
	Tbc1d13
	Lhx6
	Rabgap1
	Strbp
	Zeb2
	Snx12
	Chic1
	Magee2
	Atp7a
	P2ry10b
	Tbx22
	Diaph2
	Rab9b
	Rbm41
	Gnl3l
	Cnksr2
	Reps2
	Car5b
	Egfl6
	Pak6
	Rtf1
	Mga
	Mapkbp1
	Zscan29
	Mfap1a
	Bloc1s6
	Sppl2a
	Bcl2l11
	Polr1b
	Atrn
	Spef1
	Rassf2
	Cds2
	N4bp2l2
	Kl
	Rnasel
	Xpr1
	Soat1
	Rasal2
	Dars2
	Prrx1
	Ildr2
	Pogk
	Tmco1
	Lmx1a
	Pbx1
	Dedd
	Nectin4
	Slamf1
	Vangl2
	Kcnj10
	Igsf9
	Cadm3
	Ifi203
	Pld5
	Wdr26
	Enah
	Bpnt1
	Slc30a10
	Rcor3
	A130010J15Rik
	Camk1d
	Kcnc1
	Saa4
	E2f8
	Nav2
	Asb7
	Mef2a
	Igf1r
	Fam169b
	Mctp2
	Ntrk3
	Gdpgp1
	Vps33b
	Man2a2
	Grm5
	Kctd14
	Rsf1
	Lrrc32
	Pgm2l1
	P4ha3
	Psd3
	Ncan
	Slc25a42
	Pde4c
	Ankle1
	Zfp882
	Slc35e1
	Smim7
	Nwd1
	Mcm5
	Rasd2
	Zfp827
	Rnf150
	Dnajb1
	Gipc1
	Ces1g
	Nup93
	Fhod1
	Ceacam1
	Zfp607b
	Kcnk6
	Zfp74
	Rgs9bp
	Iglon5
	Cd33
	Spib
	Dhdh
	Trim12c
	Olfr658
	Itpripl2
	Tmc7
	Knop1
	Mosmo
	Gga2
	Slx1b
	Cd2bp2
	Zfp553
	Fbrs
	Stx1b
	Chst15
	Ebf3
	Adgra1
	Zfp941
	Ostf1
	Rorb
	Zfand5
	Apba1
	Pgm5
	Smarca2
	Vldlr
	Rfx3
	Cd274
	9930021J03Rik
	Asah2
	Pten
	Ifit1
	Arhgap19
	Cox15
	Scd3
	Hif1an
	Slf2
	Btrc
	Wbp1l
	Trub1
	Emx2
	Usp27x
	Was
	Cdan1
	Tubb5
	Trim39
	Cd2ap
	Clic5
	Tmem151b
	Vegfa
	Mocs1
	Plin3
	Acer1
	Fbxl17
	Rasgrp3
	Slc8a1
	Cd93
	Napb
	Pofut1
	Cbfa2t2
	E2f1
	Soga1
	D630003M21Rik
	Fitm2
	Wfdc12
	Trp53rkb
	Kcnb1
	Pck1
	Vapb
	Ss18l1
	Gata5
	Sema5b
	Stxbp5l
	Gsk3b
	Igsf11
	Gramd1c
	Cd200r1
	Nxpe3
	Cep97
	Nsun3
	Robo2
	Rbm11
	Synj1
	Paxbp1
	Ifngr2
	Slc5a3
	Runx1
	Fndc1
	Prdm9
	Lix1
	2810021J22Rik
	Zfp39
	Kcnj12
	Akap10
	Hs3st3b1
	Tmem220
	Myh10
	Pfas
	Slc2a4
	Ankfy1
	Cyb5d2
	Slc43a2
	Rflnb
	Nufip2
	Rad51d
	Slfn5
	Dph6
	Npbwr1
	St18
	Sgk3
	Prex2
	Tfap2b
	Lmbrd1
	Cnnm3
	Creg2
	Il1rl1
	Il18r1
	Stat1
	Nab1
	Plcl1
	Casp8
	Nbeal1
	Cd28
	Fzd5
	D630023F18Rik
	Tns1
	Pla2g2d
	Iffo2
	Hspb7
	Fblim1
	Prdm2
	Draxin
	Angptl7
	Casz1
	Kif1b
	Tmem201
	Gpr157
	Tnfrsf9
	Vamp3
	Dffb
	Prdm16
	Ski
	Slc35e2
	Tas1r3
	Ube2j2
	Steap2
	Sema3a
	Pclo
	Rsbn1l
	Frmd5
	Casc4
	Ctdspl2
	Nfat5
	Zfhx3
	Ddx19b
	Adat1
	Banp
	Afg3l1
	Rhou
	Nup133
	Trpc6
	Ccdc82
	Fat3
	Zfp558
	Zfp26
	Pin1
	Ilf3
	Anln
	Opcml
	Ntm
	Zbtb44
	Pate9
	Chek1
	Unc13b
	Slc25a51
	Stx17
	Fsd1l
	Fktn
	Zfp462
	Tmem245
	Palm2
	Akap2
	Inip
	Slc31a1
	Tnfsf15
	Pappa
	Bnc2
	Slc24a2
	Mllt3
	Acot11
	Podn
	Zyg11b
	Ap1s3
	A630001G21Rik
	Ncl
	Cops7b
	Chrnd
	Agap1
	Kif1a
	Neu4
	Rnf152
	Tnfrsf11a
	Bcl2
	Serpinb8
	Tfcp2l1
	Golt1a
	Glrx2
	Rgl1
	Preb
	Supt7l
	Fosl2
	Uvssa
	Nat8l
	Htt
	Zfp518b
	Lcorl
	Commd8
	Clock
	Srp72
	Slc4a4
	Cxcl5
	Cxcl15
	Aak1
	Plxna1
	Wnt7a
	Slc6a6
	Eogt
	Cntn3
	Oxtr
	Srgap3
	Lhfpl4
	Cand2
	Mbd4
	Zfp422
	Zfp248
	Lrtm2
	Erc1
	Gdf3
	Eno2
	Cd4
	Clec7a
	Klra2
	Crebl2
	Epas1
	Ttc7
	Nrxn1
	Arhgap12
	B4galt6
	Slc25a46
	Iws1
	Camk4
	Fam53c
	Slc23a1
	Psd2
	Pura
	Pcdhb13
	Trim36
	Sema6a
	Slc12a2
	Gm4951
	Gm4841
	Onecut2
	Fech
	Atp8b1
	Nedd4l
	Extl3
	Fzd3
	Slc39a14
	Nudt18
	Fam160b2
	Xpo7
	Gfra2
	Fndc3a
	Pcdh17
	Rictor
	Ranbp3l
	Npr3
	Mtmr12
	Cdh12
	Sema5a
	Erich5
	Fbxo43
	Ywhaz
	Trhr
	Has2
	Atad2
	Cracr2b
	Igf2
	Mrgpre
	Fadd
	Insr
	Mcph1
	Tpte
	Plekha2
	Ddhd2
	Pomk
	Hook3
	Rab11fip1
	Unc5d
	Wrn
	Lonrf1
	AI429214
	Msr1
	Vps37a
	Slc7a2
	Rwdd4a
	Mavs
	Phactr2
	Gje1
	Ahi1
	Akap7
	Ptprk
	9330159F19Rik
	Rsph4a
	Frk
	Slc16a10
	Cdk19
	Ddo
	Bend3
	Lin28b
	Sim1
	Nus1
	Pkib
	Anapc16
	Spock2
	Adamts14
	Tacr2
	Vps26a
	Rufy2
	Ado
	Tmem26
	Rhobtb1
	Slc16a9
	Pcdh15
	Ybey
	Pdxk
	Ilvbl
	Cxcl9
	Shroom3
	Prdm8
	Lin54
	Zfp326
	Barhl2
	1700028K03Rik
	Tmed5
	Pitpnb
	Git2
	Mlec
	Dynll1
	Gatc
	Oas3
	Oas1e
	Psmd9
	2810006K23Rik
	Ddx55
	Dhx37
	Tmem132b
	Trim44
	Slc1a2
circRNA, circular RNA; miRNA/miR, microRNA; mmu, Mus musculus.
